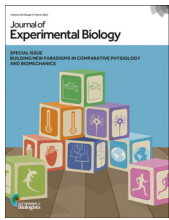

**Cover:** Building new paradigms in comparative physiology and biomechanics. Through reviews of the literature and the collation, data mining and analysis of existing and emerging datasets, this special issue aims to generate new questions or illuminate paradigm shifts across a broad array of topics - from biomechanics and muscle physiology to ecophysiology, endocrinology, neurobiology and cardiovascular physiology (jeb244096).

## SPECIAL ISSUE Building New Paradigms in Comparative Physiology and Biomechanics

### EDITORIAL

Looking to the future: Building New Paradigms in Comparative Physiology and Biomechanics

**Franklin, C. E., Patek, S. N. and Wright, P. A.**

jeb244096

### COMMENTARIES

Epigenomics as a paradigm to understand the nuances of phenotypes

**Fanter, C., Madelaire, C., Genereux, D. P., van Breukelen, F., Levesque, D. and Hindle, A.**

jeb243411

A new conceptual framework for the musculoskeletal biomechanics and physiology of ray-finned fishes

**Camp, A. L. and Brainerd, E. L.**

jeb243376

Best practices for building and curating databases for comparative analyses

**Schwanz, L. E., Gunderson, A., Iglesias-Carrasco, M., Johnson, M. A., Kong, J. D., Riley, J. and Wu, N. C.**

jeb243295

Legs as linkages: an alternative paradigm for the role of tendons and isometric muscles in facilitating economical gait

**Usherwood, J. R.**

jeb243254

Paths towards greater consensus building in experimental biology

**Roche, D. G., Raby, G. D., Norin, T., Ern, R., Scheuffele, H., Skeeles, M., Morgan, R., Andreassen, A. H., Clements, J. C., Louissaint, S., Jutfelt, F., Clark, T. D. and Binning, S. A.**

jeb243559

Connecting materials, performance and evolution: a case study of the glue of moth-catching spiders (Cyrtarachninae)

**Diaz Jr, C., Baker, R. H., Long Jr, J. H. and Hayashi, C. Y.**

jeb243271

### REVIEWS

Phylogenetics of swimming behaviour in Medusozoa: the role of giant axons and their possible evolutionary origin

**Meech, R. W.**

jeb243382

Complications with body-size correction in comparative biology: possible solutions and an appeal for new approaches

**Glazier, D. S.**

jeb243313

Integrating theoretical and empirical approaches for a robust understanding of endocrine flexibility

**Grindstaff, J. L., Beaty, L. E., Ambardar, M. and Luttbeg, B.**

jeb243408

Physiological mechanisms of stress-induced evolution

**Mojica, E. A. and Kultz, D.**

jeb243264

Meta-analytic approaches and effect sizes to account for 'nuisance heterogeneity' in comparative physiology

**Noble, D. W. A., Pottier, P., Lagisz, M., Burke, S., Drobnjak, S. M., O'Dea, R. E. and Nakagawa, S.**

jeb243225

Linking environmental salinity to respiratory phenotypes and metabolic rate in fishes: a data mining and modelling approach

**Harter, T. S., Damsgaard, C. and Regan, M. D.**

jeb243421

Conserved and convergent mechanisms underlying performance–life-history trade-offs

**Husak, J. F. and Lailvaux, S. P.**

jeb243351

Blending physiology and RNAseq to provide new insights into regulation of epithelial transport: switching between ion secretion and reabsorption

**Kolosov, D. and O'Donnell, M. J.**

jeb243293

### RESEARCH ARTICLES

Stress response gene family expansions correlate with invasive potential in teleost fish

**Stanley, T. R., Guisbert, K. S. K., Perez, S. M., Oneka, M., Kernin, I., Higgins, N. R., Lobo, A., Subasi, M. M., Carroll, D. J., Turingan, R. G. and Guisbert, E.**

jeb243263

Scaling of fibre area and fibre glycogen concentration in the hindlimb musculature of monitor lizards: implications for locomotor performance with increasing body size

**Cieri, R. L., Dick, T. J. M., Morris, J. S. and Clemente, C. J.**

jeb243380

Predicting selection–response gradients of heat tolerance in a widespread reef-building coral

**Weeriyannun, P., Collins, R. B., Macadam, A., Kiff, H., Randle, J. L. and Quigley, K. M.**

jeb243344

Molecular evidence of intertidal habitats selecting for repeated ice-binding protein evolution in invertebrates

**Box, I. C. H., Matthews, B. J. and Marshall, K. E.**  
jeb243409

A quantitative genetics perspective on the body-mass scaling of metabolic rate

**Careau, V. and Glazier, D. S.**  
jeb243393

Stride frequency or length? A phylogenetic approach to understand how animals regulate locomotor speed

**Granatosky, M. C. and McElroy, E. J.**  
jeb243231

The mechanics of acoustic signal evolution in field crickets

**Godthi, V., Balakrishnan, R. and Pratap, R.**  
jeb243374

The evolution of asymmetrical gaits in gnathostome vertebrates

**McElroy, E. J. and Granatosky, M. C.**  
jeb243235

Impact of fluctuating developmental temperatures on phenotypic traits in reptiles: a meta-analysis

**Raynal, R. S., Noble, D. W. A., Riley, J. L., Senior, A. M., Warner, D. A., While, G. M. and Schwanz, L. E.**  
jeb243369

2D and 3D visualizations of archosaur jaw muscle mechanics, ontogeny and phylogeny using ternary diagrams and 3D modeling

**Cost, I. N., Sellers, K. C., Rozin, R. E., Spates, A. T., Middleton, K. M. and Holliday, C. M.**  
jeb243216

Phylogenetic analysis of adaptation in comparative physiology and biomechanics: overview and a case study of thermal physiology in treefrogs

**Moen, D. S., Cabrera-Guzmán, E., Caviedes-Solis, I. W., González-Bernal, E. and Hanna, A. R.**  
jeb243292

Cardiovascular contributions and energetic costs of thermoregulation in ectothermic vertebrates

**Parlin, A. F. and Schaeffer, P. J.**  
jeb243095
